# Supplementary material for: Factors Affecting Continued Participation in Tuberculosis Contact Investigation in a Low-Income, High-Burden Setting
Source: MDPI journal article supplement (doi:10.3390/tropicalmed5030124), 2020-07-29
Supplement: s1 [file s1]

**Supplementary Table S1: Accessibility to TB contact investigation among participants**

| <b>Characteristics (n=237)</b>                                    | <b>Frequency (%)</b> |
|-------------------------------------------------------------------|----------------------|
| <b>Information</b>                                                |                      |
| Telephone                                                         | 32 (13.5)            |
| Visit to my house                                                 | 9 (3.8)              |
| Sent a letter to my house                                         | 160 (67.5)           |
| Visit to school or workplace                                      | 26 (11.0)            |
| Other (passive screening)                                         | 10 (4.2)             |
| <b>Distance</b>                                                   |                      |
| Less than 2 km from the Clinic                                    | 3 (1.3)              |
| Between 2 km and 9km from the Clinic                              | 195 (82.3)           |
| From 10 km to 15 km                                               | 39 (16.5)            |
| 16km or above                                                     | 0 (0.0)              |
| <b>Transportation (how would you normally get to the clinic?)</b> |                      |
| Walking                                                           | 0 (0.0)              |
| Car                                                               | 167 (70.5)           |
| Motorcycle                                                        | 2 (0.8)              |
| Bus                                                               | 15 (6.3)             |
| Other (charter transport)                                         | 53 (22.4)            |
